# Supplementary material
Source: publisher site journal article supplement (https://www.dovepress.com/article/411575)
Supplement: Supplementary file 1 [file get_supplementary_file.php]

**Supplementary figure 1.** The change of EP300 protein expression and total score of PANSS scale

The change of EP300 protein expression(ng/ml)


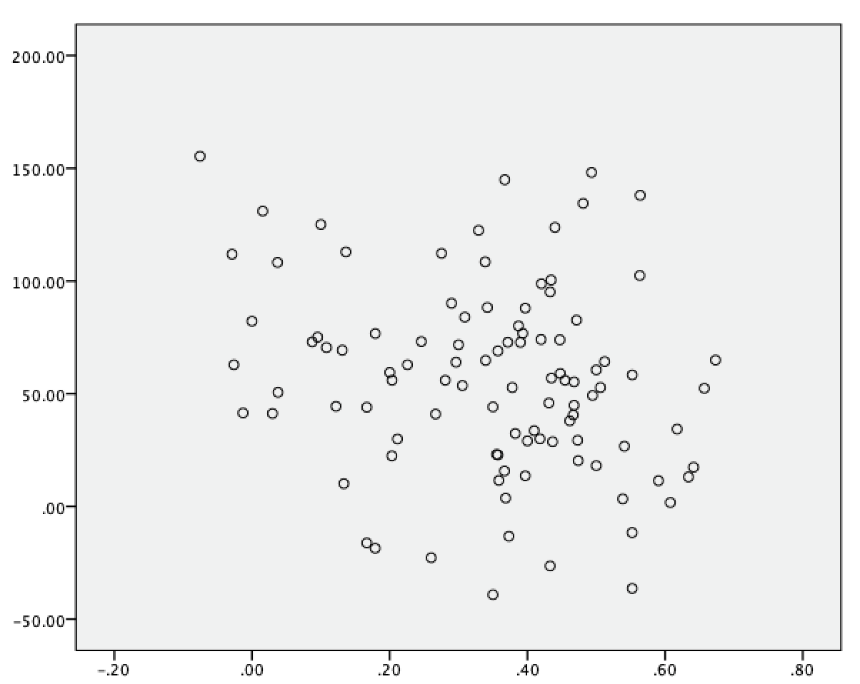


Total score of PANSS scale (%)

**Supplementary figure 2.** The change of EP300 protein expression and positive symptoms of PANSS scale

The change of EP300 protein expression(ng/ml)


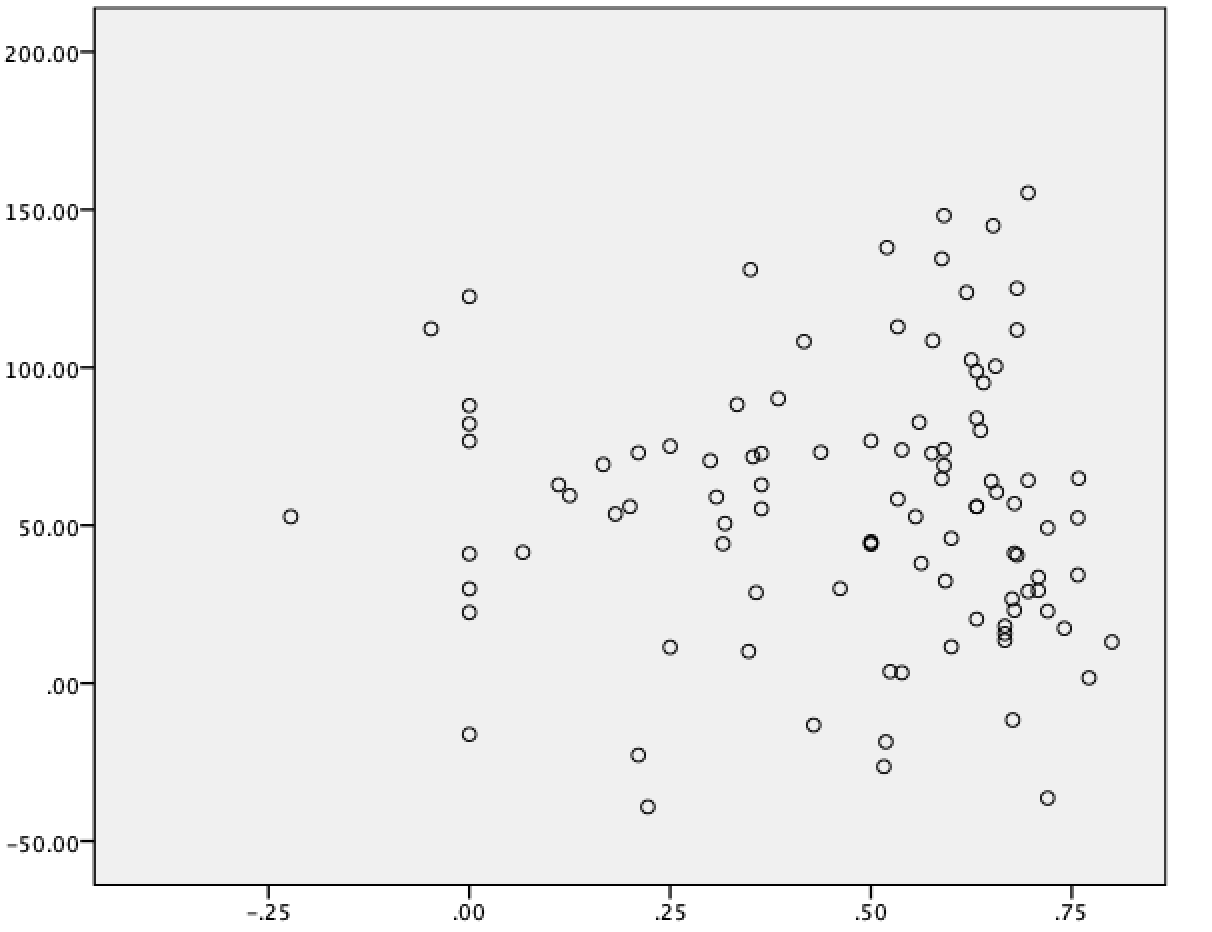


Positive symptoms of PANSS scale (%)

**Supplementary figure 3.** The change of EP300 protein expression and negative symptoms of PANSS scale


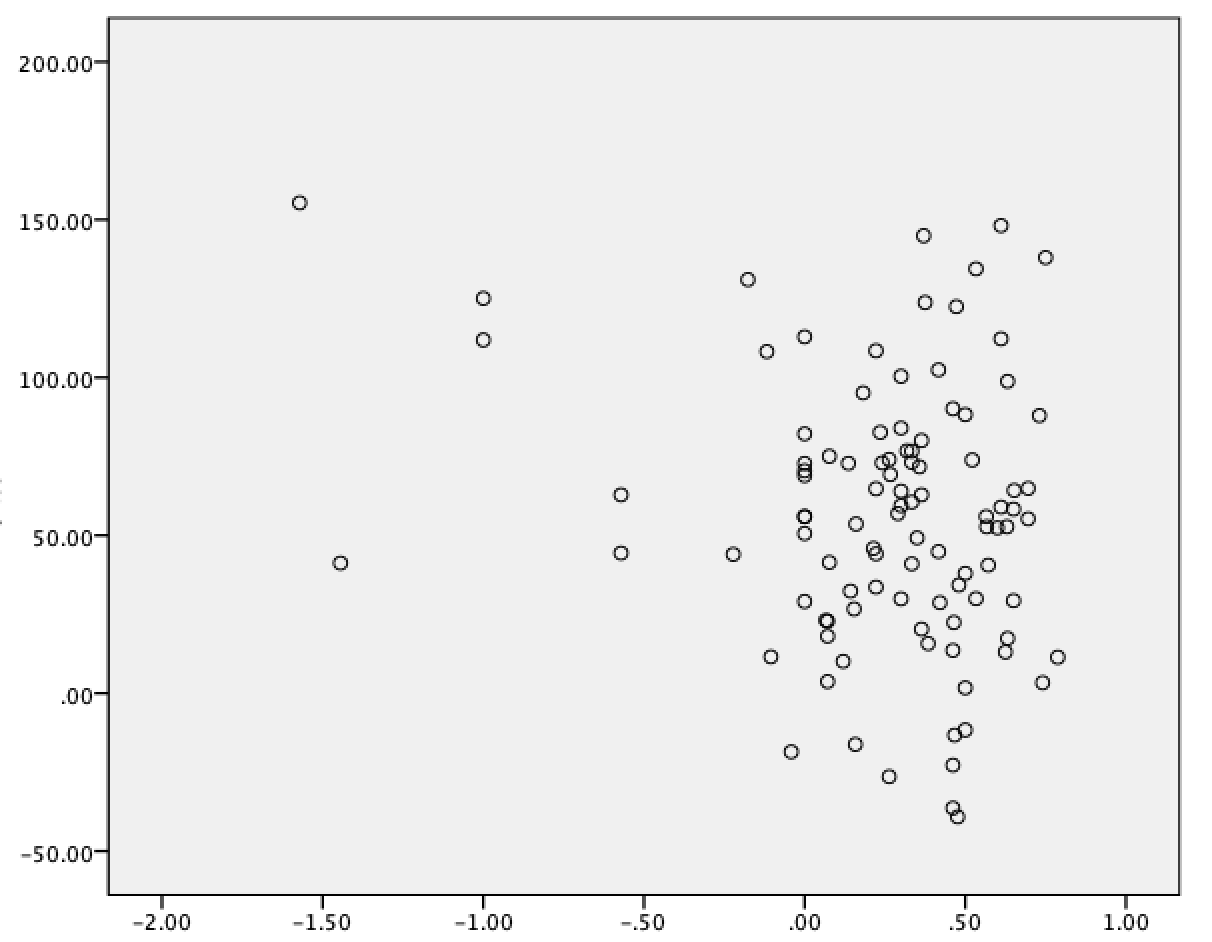


The change of EP300 protein expression(ng/ml)

Negative symptoms of PANSS scale (%)

**Supplementary figure 4.** The change of EP300 protein expression and general psychiatric symptoms of PANSS scale


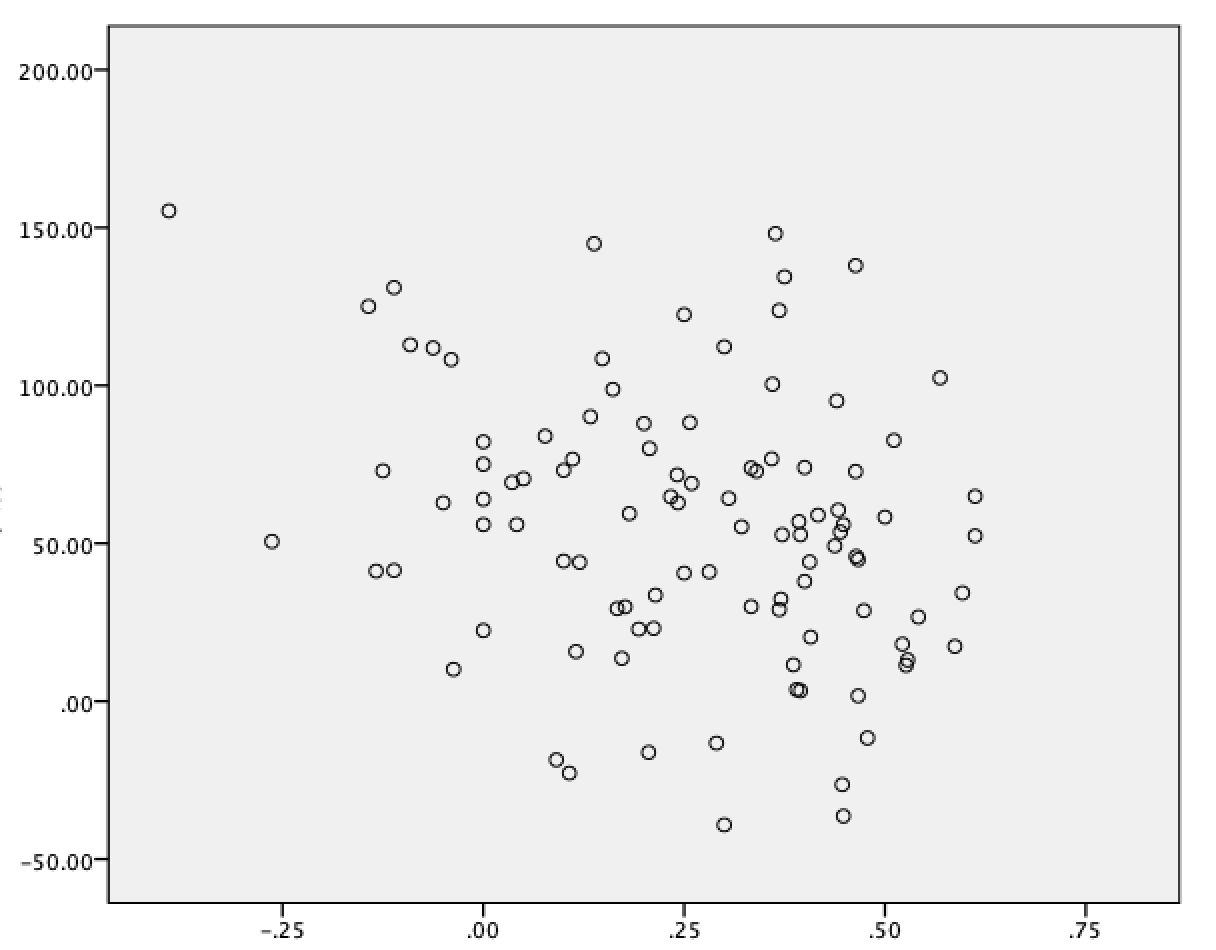


The change of EP300 protein expression(ng/ml)

General psychiatric symptoms of PANSS scale (%)

**Supplementary figure 5.** The change of EP300 protein expression and lack reaction of PANSS scale


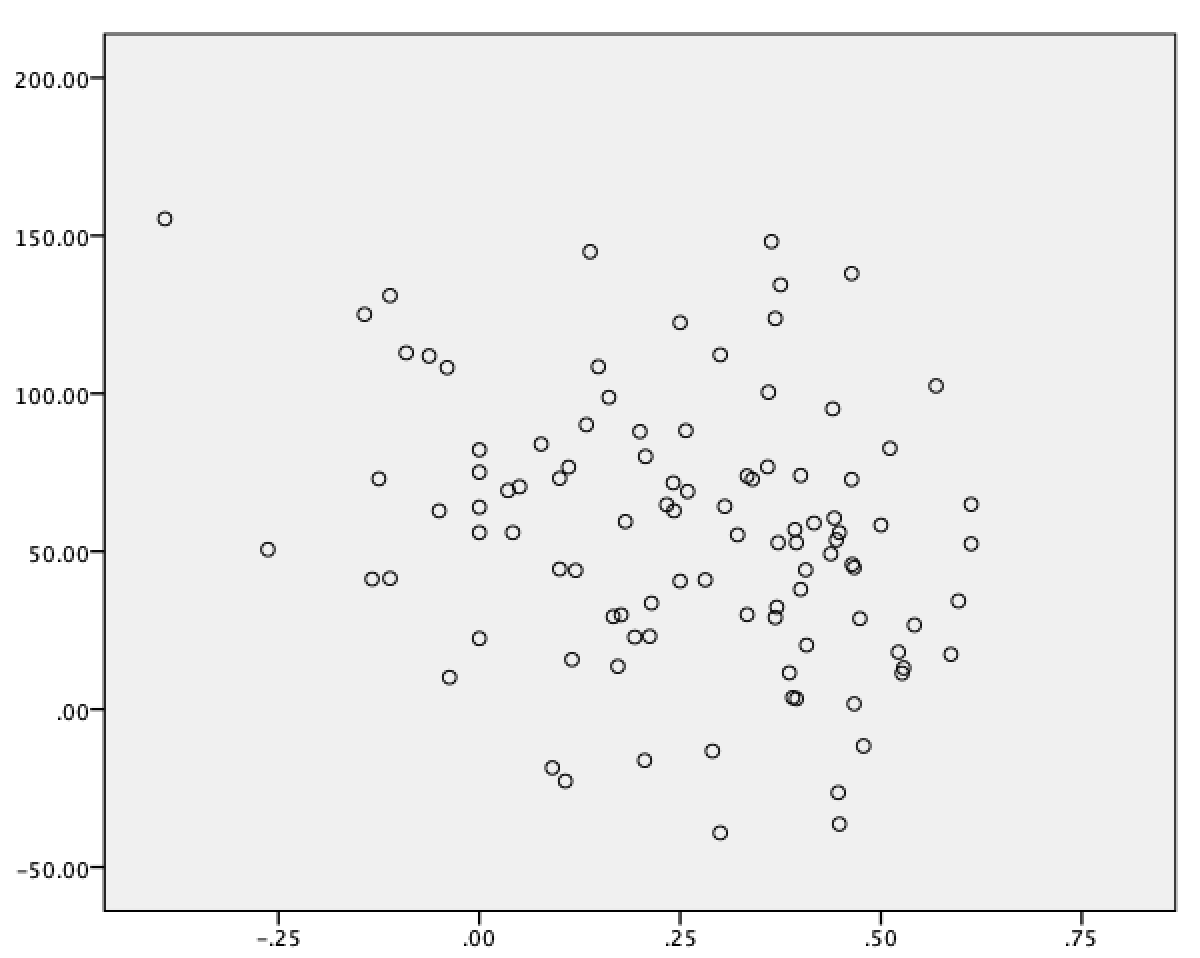


The change of EP300 protein expression(ng/ml)

Lack reaction of PANSS scale (%)

**Supplementary figure 6.** The change of EP300 protein expression and disturbance of thought of PANSS scale


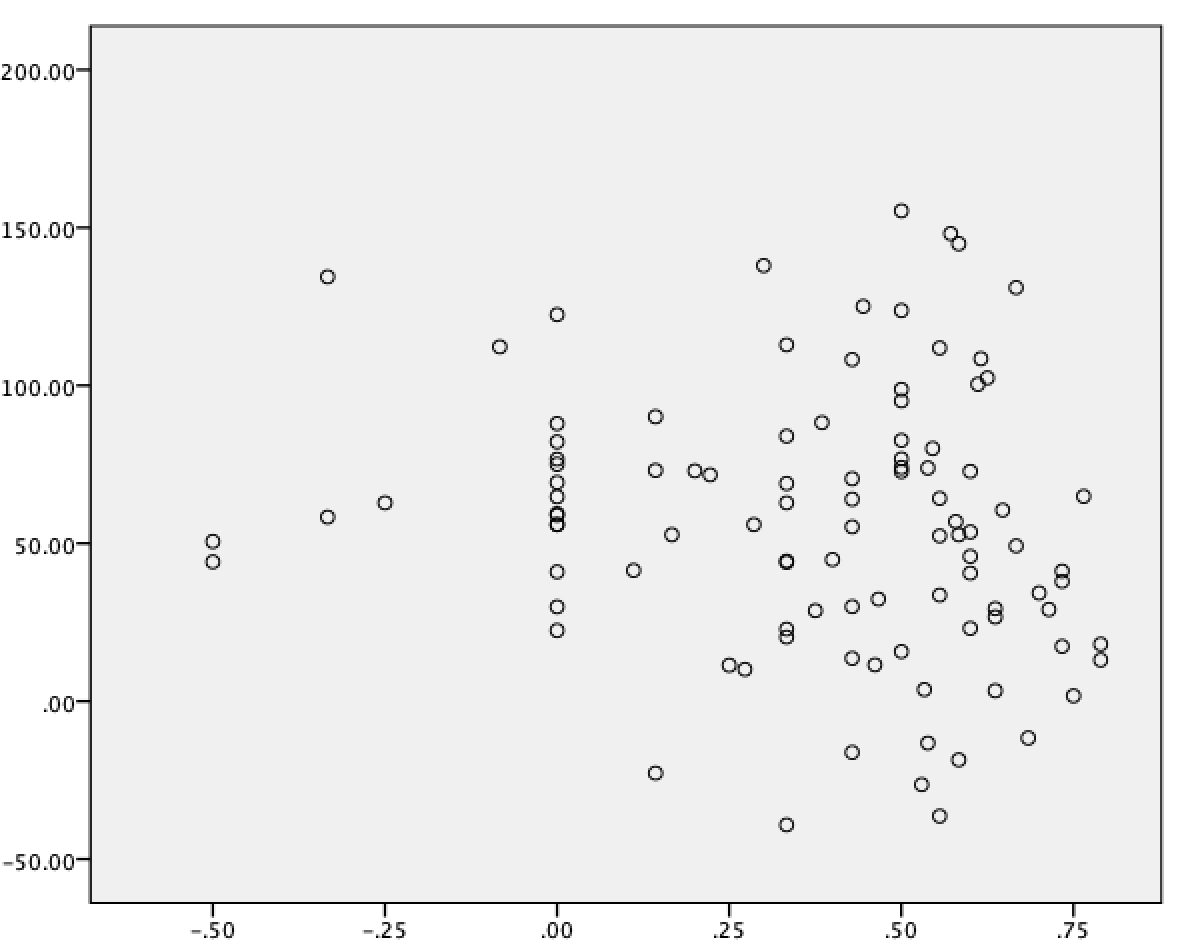


The change of EP300 protein expression(ng/ml)

Disturbance of thought of PANSS scale (%)

**Supplementary figure 7.** The change of EP300 protein expression and irritability of PANSS scale

The change of EP300 protein expression(ng/ml)


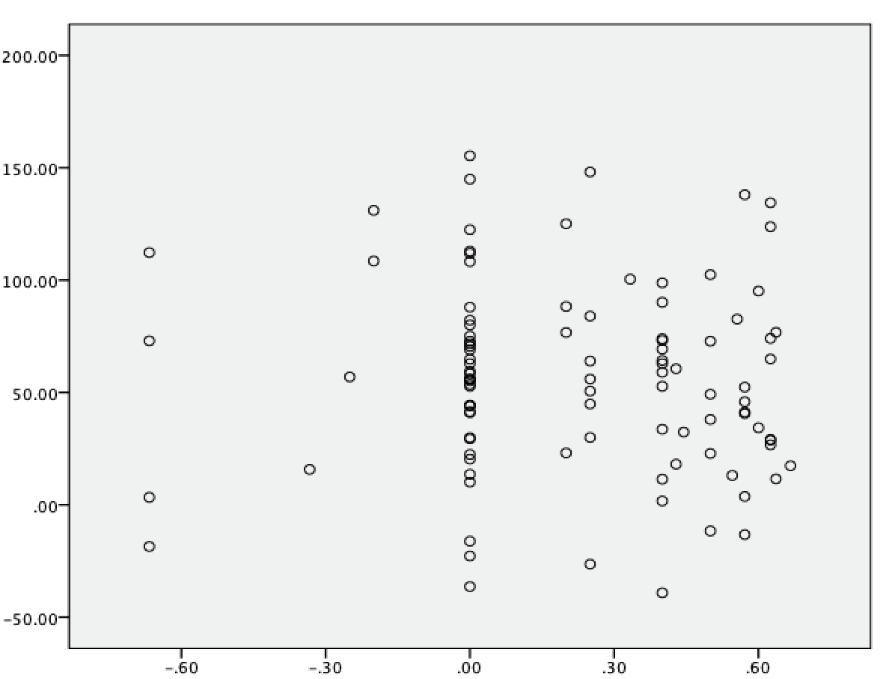


Irritability of PANSS scale (%)

**Supplementary figure 8.** The change of EP300 protein expression and paranoid aggressive of PANSS scale


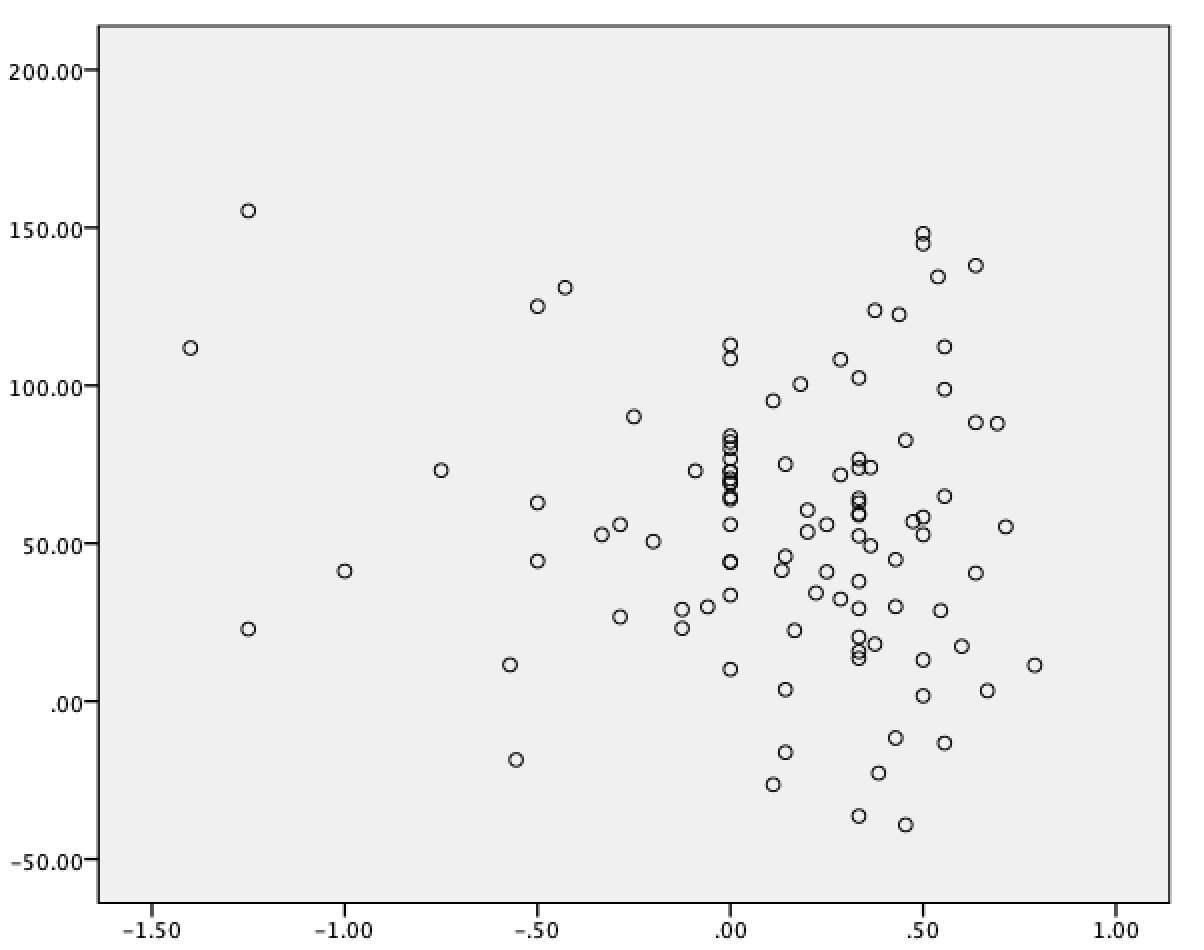


The change of EP300 protein expression(ng/ml)

Paranoid aggressive of PANSS scale (%)

**Supplementary figure 9.** The change of EP300 protein expression and depression of PANSS scale


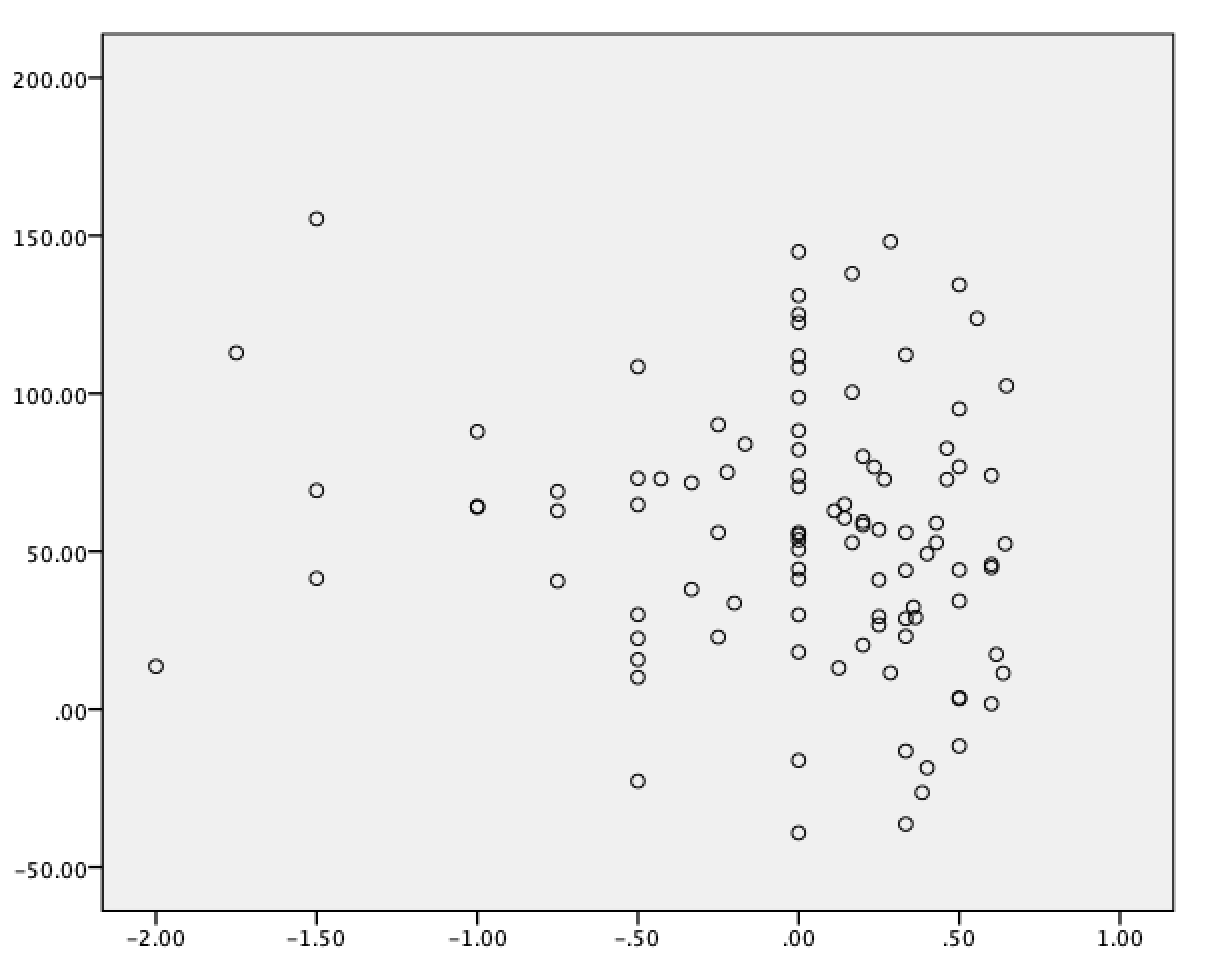


The change of EP300 protein expression(ng/ml)

Depression of PANSS scale (%)
